# Supplementary material for: Gut Microbiota Mediates Prenatal METH Exposure-Induced Anxiety- and Depression-Like Behaviors by Modulating the Wnt Signaling Pathway
Source: Research Square preprint supplement (doi:10.21203/rs.3.rs-5224306/v1), 2024-10-15
Supplement: Supplementary file 1 [file e12f48f2f14a32ea099a43ad.docx]

**Supplementary Table 1. The primers used in the present study.**

| GeneSymbol | Forward/Reverse | Primer（5‘ to 3’） |
| --- | --- | --- |
| *Wnt3* | Forward | TAAAGTGTAAATGCCACGGGTT |
| Reverse | CGGAGGCACTGTCGTACTTG |
| *Lrp6* | Forward | GTGTATCCACCATGTATTCTCTGTTGGT |
| Reverse | GGGTTGATTCCAATGCTTCACT |
| *Lef1* | Forward | CCCACACGGACAGTGACCTA |
| Reverse | TGGGCTCCTGCTCCTTTCT |
| *Gsk-3β* | Forward | CGGGACCCAAATGTCAAACT |
| Reverse | TCCGAGCATGTGGAGGGATA |
| *β-catenin* | Forward | ATGGAGCCGGACAGAAAAGC |
| Reverse | CTTGCCACTCAGGGAAGGA |
| *Fzd1* | Forward | TGGTTTTAGCCAAACTGCAA |
| Reverse | CCAGACAGGAGCACACAAGA |
| *Il-6* | Forward | ATTTCCTCTGGTCTTCTGG |
| Reverse | CTGGCTTTGTCTTTCTTGTT |
| *Il-1β* | Forward | ATTGTGGCTGTGGAGAAG |
| Reverse | AAAGATGAAGGAAAAGAAGGTG |
| *Tnf-α* | Forward | CGTCGTAGCAAACCACCAAG |
| Reverse | GAGGCTGACTTTCTCCTGGT |
| *Zo-1* | Forward | GCCGCTAAGAGCACAGCAA |
| Reverse | TCCCCACTCTGAAAATGAGGA |
| *Occludin* | Forward | TTGAAAGTCCACCTCCTTACAGA |
| Reverse | CCGGATAAAAAGAGTACGCTGG |
| *Claudin-5* | Forward | GCAAGGTGTATGAATCTGTGCT |
| Reverse | GTCAAGGTAACAAAGAGTGCCA |
| *β-Actin* | Forward | CGTTGACATCCGTAAAGACC |
| Reverse | ACAACAGTCCGCCTAGAAGC |
